# Supplementary material for: Photolithographic surface micromachining of polydimethylsiloxane (PDMS)
Source: Royal Society of Chemistry journal article supplement (doi:10.1039/c1lc20721k), 2011-11-17
Supplement: c1lc20721k.pdf [file c1lc20721k.pdf]

# Photolithographic surface micromachining of polydimethylsiloxane (PDMS)

Weiqliang Chen,<sup>a</sup> Raymond H. W. Lam<sup>ab</sup> and Jianping Fu<sup>ac</sup>

<sup>a</sup> Department of Mechanical Engineering, University of Michigan, Ann Arbor, Michigan, 48109, USA. E-mail: [jpfu@umich.edu](mailto:jpfu@umich.edu)

<sup>b</sup> Department of Mechanical and Biomedical Engineering, City University of Hong Kong, Kowloon, Hong Kong, China.

<sup>c</sup> Department of Biomedical Engineering, University of Michigan, Ann Arbor, Michigan, 48109, USA.

**Table S1** Summary of the geometrical factors of the PDMS microstructures.

| Microfiltration membrane         | Membrane thickness | Hole diameter      | Hole c.t.c. distance |
|----------------------------------|--------------------|--------------------|----------------------|
| Fig. 3a left & Fig. S2a left     | 10 $\mu\text{m}$   | 20 $\mu\text{m}$   | 50 $\mu\text{m}$     |
| Fig. 3a middle & Fig. S2a middle |                    | 20 $\mu\text{m}$   | 200 $\mu\text{m}$    |
| Fig. 3a right & Fig. S2a right   |                    | 8 $\mu\text{m}$    | 20 $\mu\text{m}$     |
| Fig. 4a-e & Fig. S3a&b           |                    | 4 $\mu\text{m}$    | 8 $\mu\text{m}$      |
| Free-standing beam               | Beam thickness     | Minimum beam width | Beam length          |
| Fig. 3b & Fig. S2b, left         | 500 nm             | 10 $\mu\text{m}$   | 800 $\mu\text{m}$    |
| Fig. 3b & Fig. S2b, middle       |                    | 5 $\mu\text{m}$    | 800 $\mu\text{m}$    |
| Fig. 3b & Fig. S2b, right        |                    | 5 $\mu\text{m}$    | 300 $\mu\text{m}$    |
| Fig. 4f & Fig. S3c               |                    | 2 $\mu\text{m}$    | 800 $\mu\text{m}$    |
| Fig. 4g & Fig. S3e               |                    | 10 $\mu\text{m}$   | 800 $\mu\text{m}$    |
| Fig. 4h&i & Fig. S3d             |                    | 5 $\mu\text{m}$    | 800 $\mu\text{m}$    |

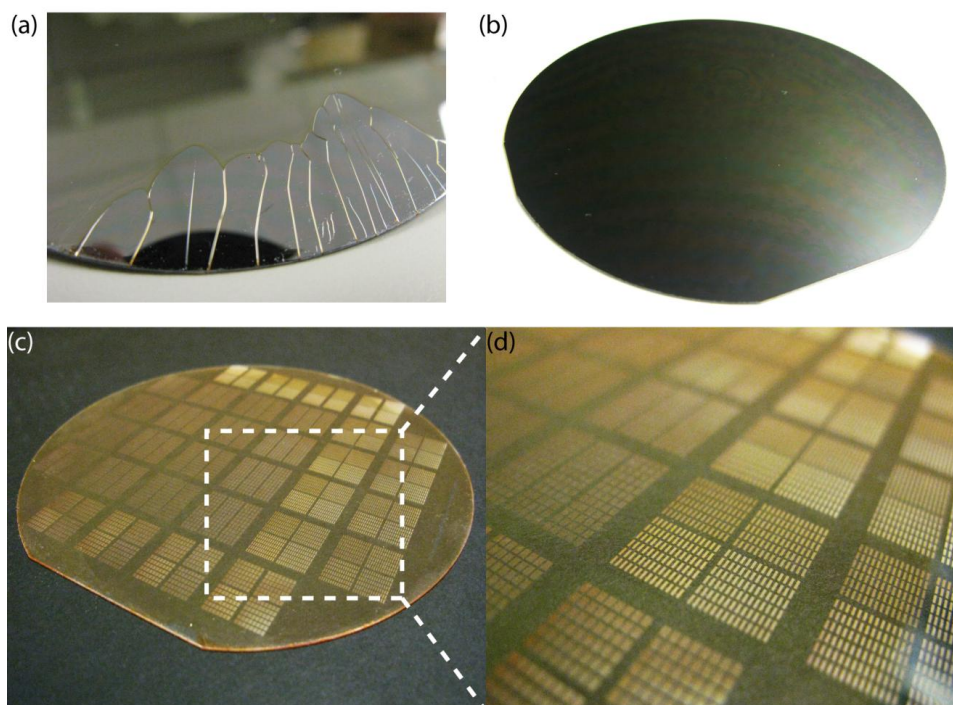

**Fig. S1** (a-b) Images of photoresist spin-coated on the PDMS surface with (b) or without (a) the treatment of O<sub>2</sub> plasma. Photoresist could not be spread out uniformly on the PDMS surface without an O<sub>2</sub> plasma treatment (a), while after the O<sub>2</sub> plasma treatment (b), photoresist could be uniformly spin-coated on PDMS. In a&b, 4 inch Si or glass wafers were used as substrates. (c-d) Photolithographically patterned photoresist on the O<sub>2</sub> plasma treated PDMS. In c&d, 6 inch Si or glass wafers were used as substrates.

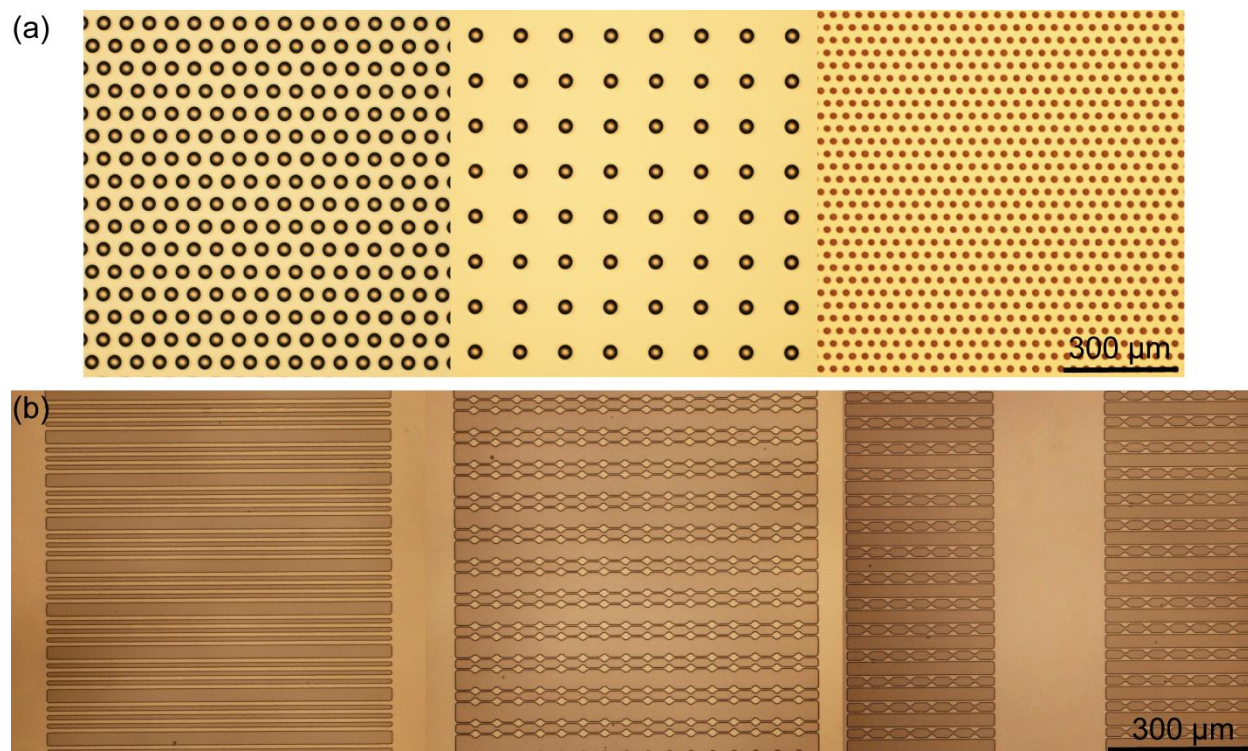

**Fig. S2** Bright-field images of patterned PDMS layers on the Si substrates. (a) Arrays of through holes with the hole diameter of 20 μm (left and middle) or 8 μm (right). (b) Patterned PDMS strips on the Si substrates.

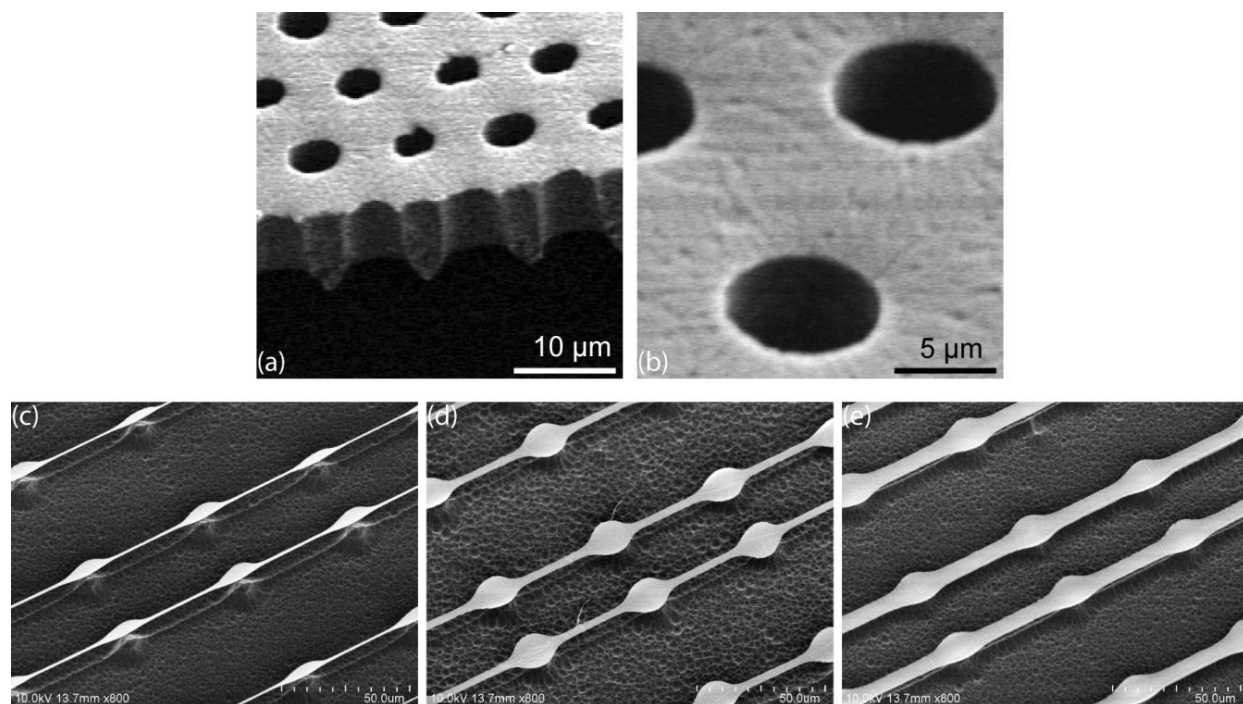

**Fig. S3** SEM images of free-standing PDMS microfiltration membranes (a&b) and beam structures (c-e). (a) Cross-sectional and (b) zoom-in images of the PDMS microfiltration membrane. The membrane thickness was 10 μm, and the hole diameter was 4 μm. (c)-(e) Free-standing PDMS beam structures, with the beam thickness of 500 nm and total beam length of 800 μm. The minimum beam widths were 2 μm (c), 5 μm (d), 10 μm (e), respectively.
